# Supplementary material
Source: MDPI journal article supplement (https://www.mdpi.com/2039-4403/14/2/91)
Supplement: s1 [file s1]

**Supplementary Table S1. Excluded studies from the review**

| ID | Authors                                 | Title                                                                                                                                    | Journal                                                           | Year | DOI                            | Reason for exclusion                  |
|----|-----------------------------------------|------------------------------------------------------------------------------------------------------------------------------------------|-------------------------------------------------------------------|------|--------------------------------|---------------------------------------|
| 84 | García-Viola et al                      | The Influence of Gamification on Decision Making in Nursing Students                                                                     | The Journal of Nursing Education                                  | 2019 | 10.3928/01484834-20191120-07   | Gamification (no Escape Room)         |
| 92 | Darby et al                             | Escape Room Relay Race: “Go for the Gold” in Formative Assessment                                                                        | Journal of Nursing Education                                      | 2020 | 10.3928/01484834-20201020-09   | Methodology (Critical appraisal)      |
| 37 | Daniel, Valko, McAtee & N-Wilfong       | Using an Escape Room Modality to Teach Mock Code Essentials                                                                              | The Journal of Continuing Education in Nursing                    | 2021 | 10.3928/00220124-20210216-05   | Methodology (Critical appraisal)      |
| 40 | Fitzpatrick, Smith-Brooks, Jones-Parker | Integration of TeamSTEPPS Framework and Escape Room to Improve Teamwork and Collaboration                                                | Journal of Doctoral Nursing Practice                              | 2021 | 10.1891/JDNP-D-20-00054        | Grey Literature (no research article) |
| 42 | Frederick & Reed                        | Operation Outbreak: A Periop 101 Exam Review Escape Room                                                                                 | Simulation & Gaming                                               | 2021 | 10.1177/1046878120948922       | Methodology (Critical appraisal)      |
| 91 | Gabriel et al                           | Teaching Evidence-Based Sepsis Care: A Sepsis Escape Room                                                                                | The Journal of Continuing Education in Nursing                    | 2021 | 10.3928/00220124-20210414-05   | Methodology (Critical appraisal)      |
| 45 | Gutiérrez-Puertas et al                 | Guess it (SVUAL): An app designed to help nursing students acquire and retain knowledge about basic and advanced life support techniques | Nurse Education in Practice                                       | 2021 | 10.1016/j.nepr.2020.102961     | Gamification (no Escape Room)         |
| 94 | Hwang, Kim & Hwang                      | The Effect of Game-Based Student Response System (GSRS) on Nursing Education: Focusing on Learning Engagement                            | Journal of Convergence for Information Technology                 | 2021 | 10.22156/CS4SMB.2021.11.01.156 | Language (Korean)                     |
| 48 | Ma et al                                | Does theme game-based teaching promote better learning about disaster nursing than scenario simulation: A randomized controlled trial    | Nurse Education Today                                             | 2021 | 10.1016/j.nedt.2021.104923     | Methodology (Critical appraisal)      |
| 52 | Putri & Sumartini                       | Integrating Peer Learning Activities and Problem-Based Learning in Clinical Nursing Education                                            | SAGE Open Nursing                                                 | 2021 | 10.1177/23779608211000262      | Gamification (no Escape Room)         |
| 53 | Reed & Ferdig                           | Gaming and anxiety in the nursing simulation lab: A pilot study of an escape room                                                        | Journal of Professional Nursing                                   | 2021 | 10.1016/j.profnurs.2021.01.006 | Methodology (Critical appraisal)      |
| 57 | Sáiz-Manzanares et al                   | Usefulness of Digital Game-Based Learning in Nursing and Occupational Therapy Degrees: A Comparative Study at the University of Burgos   | International Journal of Environmental Research and Public Health | 2021 | 10.3390/ijerph182211757        | Gamification (no Escape Room)         |
| 67 | Wynn                                    | An escape room simulation focused on renal-impairment for prelicensure nursing students                                                  | Teaching and Learning in Nursing                                  | 2021 | 10.1016/j.teln.2020.09.006     | Methodology (Critical appraisal)      |
| 2  | Barrickman et al                        | Development and implementation of a virtual interprofessional escape room to reinforce tobacco cessation concepts                        | Journal of Interprofessional Education & Practice                 | 2022 | 10.1016/j.xjep.2022.100511     | No Nurses                             |

|     |                                             |                                                                                                                                                                                        |                                                   |      |                              |                                  |
|-----|---------------------------------------------|----------------------------------------------------------------------------------------------------------------------------------------------------------------------------------------|---------------------------------------------------|------|------------------------------|----------------------------------|
| 9   | Gu. et al                                   | Effectiveness of a game-based mobile application in educating nursing students on flushing and locking venous catheters with pre-filled saline syringes: A randomized controlled trial | Nurse Education in Practice                       | 2022 | 10.1016/j.nepr.2021.103260   | Gamification (no Escape Room)    |
| 23  | Pozo-Sánchez, Lampropoulos & López-Belmonte | Comparing Gamification Models in Higher Education Using Face-to-Face and Virtual Escape Rooms                                                                                          | Journal of New Approaches in Educational Research | 2022 | 10.7821/naer.2022.7.1025     | No Nurses                        |
| 29  | Wettergreen, Stewart & Huntsberry           | Evaluation of an escape room approach to interprofessional education and the opioid crisis                                                                                             | Currents in Pharmacy Teaching and Learning        | 2022 | 10.1016/j.cptl.2022.01.021   | Methodology (Critical appraisal) |
| 118 | Erdogan & Turan                             | Evaluation of the Effectiveness of Digital Game-Based Learning Given to Nursing Students for the Developmental Care of Infants in Neonatal Intensive Care Unit                         | CIN Computers Informatics Nursing                 | 2023 | 10.1097/CIN.0000000000000920 | Gamification (no Escape Room)    |
| 100 | HadaviBavili & İlçioğlu                     | Artwork in anatomy education: A way to improve undergraduate students' self-efficacy and attitude                                                                                      | Anatomical Science Education                      | 2023 | 10.1002/ase.2352             | Gamification (no Escape Room)    |
| 140 | Kaynak, Ergün & Karadaş                     | The effect of crossword puzzle activity used in distance education on nursing students' problem-solving and clinical decision-making skills: A comparative study                       | Nurse Education in Practice                       | 2023 | 10.1016/j.nepr.2023.103618   | Gamification (no Escape Room)    |
| 117 | Simsek-Cetinkaya & Cakir                    | Evaluation of the effectiveness of artificial intelligence assisted interactive screen-based simulation in breast self-examination: An innovative approach in nursing students         | Nurse Education Today                             | 2023 | 10.1016/j.nedt.2023.105857   | Gamification (no Escape Room)    |
| 99  | Hsu et al                                   | An online escape room-based lesson plan to teach new nurses violence de-escalation skills                                                                                              | Nurse Education Today                             | 2023 | 10.1016/j.nedt.2023.105752   | No nursing students              |
| 98  | Sara & Hunker                               | An initiative to increase nurse knowledge and decrease postpartum readmissions for preeclampsia                                                                                        | Nursing for Women's Health                        | 2023 | 10.1016/j.nwh.2023.03.007    | Nos nursing students             |

**Supplementary Table S2. Critical appraisal of the included studies (Joanna Briggs Institute tools)**

[illegible]
